# Supplementary material
Source: MDPI journal article supplement (https://www.mdpi.com/2071-1050/9/5/687)

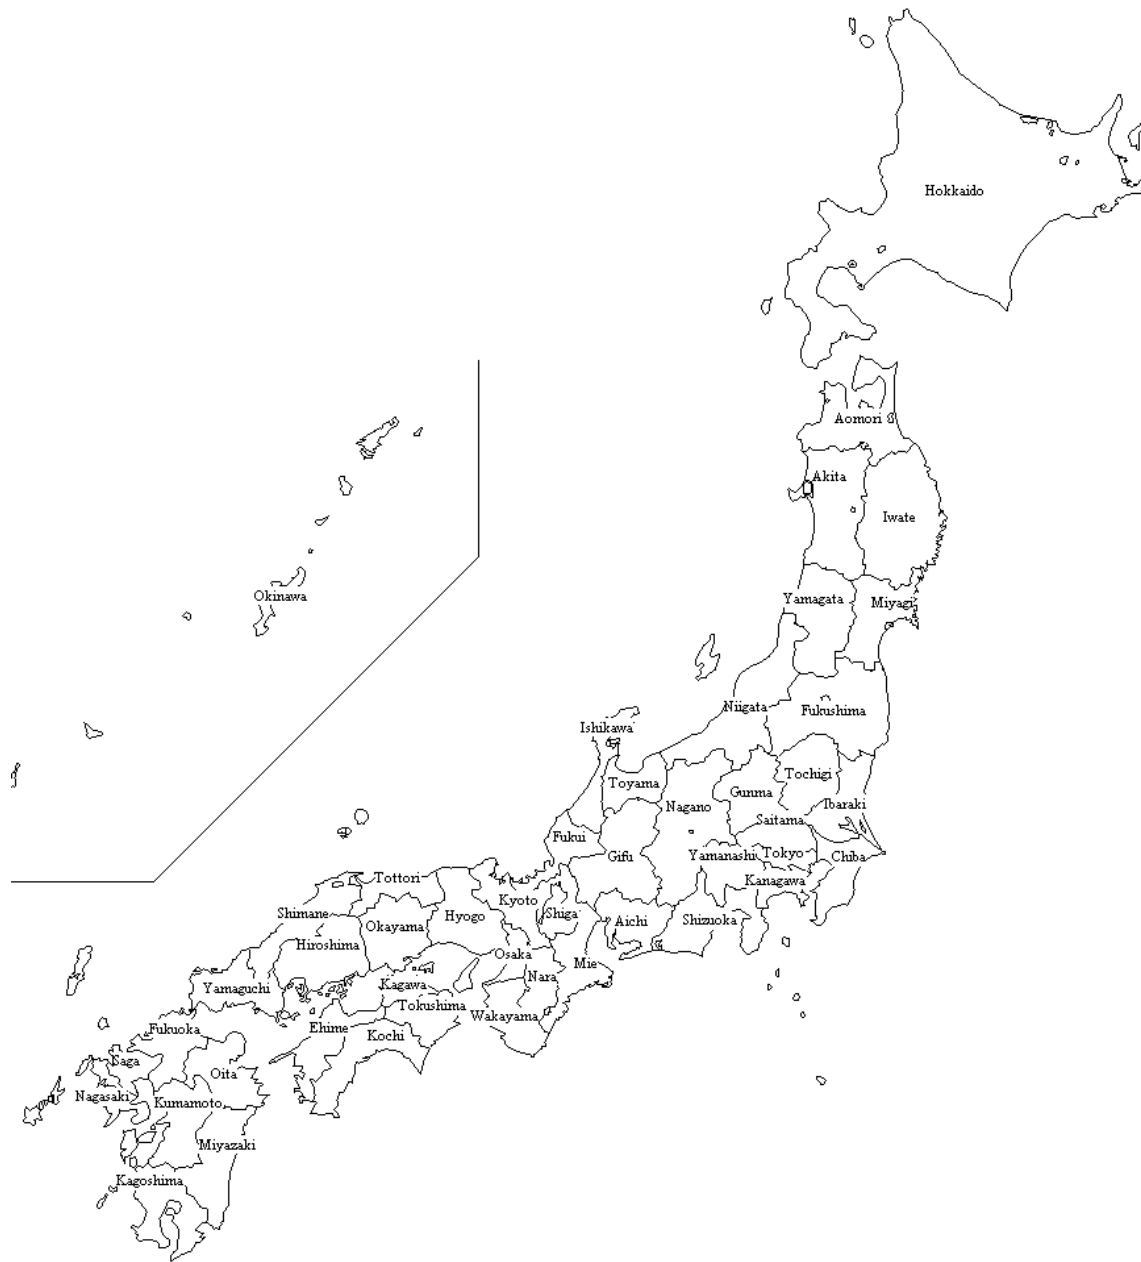

Figure S1. Map and prefecture names in Japan

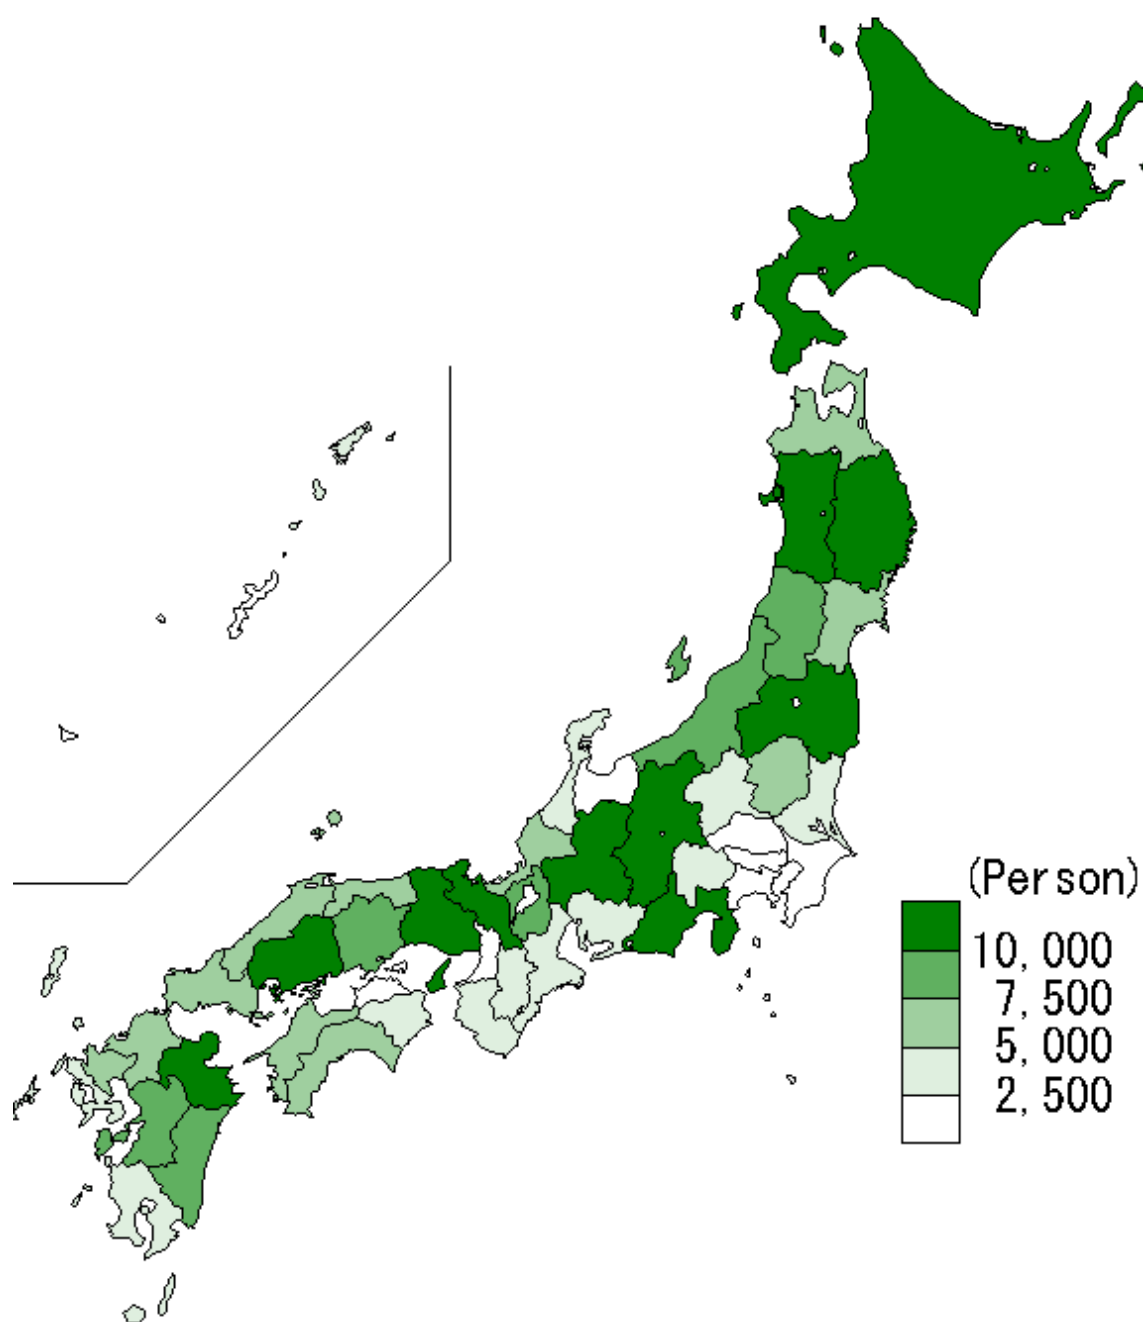

Figure S2. Number of labor in forest industry

Supplement: s1 [file s1]
